# Supplementary material for: Characterization of Metagenome-Assembled Genomes and Carbohydrate-Degrading Genes in the Gut Microbiota of Tibetan Pig
Source: Front Microbiol. 2020 Dec 23;11:595066. doi: 10.3389/fmicb.2020.595066 (PMC7785962; doi:10.3389/fmicb.2020.595066)
Supplement: Supplementary file 4 [file Table_2.XLSX]

## Sheet: Table S2
Table S2. Summary of 322 prokaryotic genomes recovered from the Tibetan pig fecal microbiome. Detailed information for individual genomes is provided, including the estimates of completeness and contamination, genome size, the number of contigs, N50, GC% content, and the taxonomic lineages predicted by GTDB-tk. The assembly statistics for individual MAGs are summarized based on the contigs 2,000 …
ID	Completeness (%)	Contamination (%)	Strain heterogeneity	Genome size (bp)	# contigs	N50	Longest contig (bp)	GC (%)	# predicted genes	GTDB-tk lineage
MAG001	100	0	0	1516699	63	42410	130853	31.2	1576	d__Archaea;p__Methanobacteriota;c__Methanobacteria;o__Methanobacteriales;f__Methanobacteriaceae;g__Methanobrevibacter_A;s__
MAG002	99.45	0.55	0	1723800	136	23819	81672	39.2	1753	d__Bacteria;p__Firmicutes;c__Bacilli;o__Lactobacillales;f__Lactobacillaceae;g__Limosilactobacillus;s__Limosilactobacillus reuteri
MAG003	99.31	0	0	2027724	113	34178	112439	49.5	1898	d__Bacteria;p__Proteobacteria;c__Gammaproteobacteria;o__Burkholderiales;f__Burkholderiaceae;g__Parasutterella;s__Parasutterella sp000980495
MAG004	99.2	0	0	1609229	55	43096	126535	31.4	1605	d__Archaea;p__Methanobacteriota;c__Methanobacteria;o__Methanobacteriales;f__Methanobacteriaceae;g__Methanobrevibacter_A;s__Methanobrevibacter_A smithii
MAG005	99.05	0.33	50	1761519	60	61220	160545	63.1	1522	d__Bacteria;p__Actinobacteriota;c__Actinomycetia;o__Actinomycetales;f__Bifidobacteriaceae;g__Bifidobacterium;s__Bifidobacterium pseudolongum
MAG006	98.67	0	0	1587051	63	43024	100097	30	1501	d__Bacteria;p__Firmicutes;c__Bacilli;o__Acholeplasmatales;f__Anaeroplasmataceae;g__;s__
MAG007	98.6	0	0	2541617	67	83614	200244	45.1	2349	d__Bacteria;p__Spirochaetota;c__Spirochaetia;o__Treponematales;f__Treponemataceae;g__Treponema_F;s__
MAG008	98.4	0	0	1837809	82	43293	192411	32.3	1740	d__Archaea;p__Methanobacteriota;c__Methanobacteria;o__Methanobacteriales;f__Methanobacteriaceae;g__Methanobrevibacter;s__Methanobrevibacter ruminantium_A
MAG009	98.39	1.34	0	1536131	127	16573	92287	54	1495	d__Bacteria;p__Firmicutes_A;c__Clostridia_A;o__Christensenellales;f__CAG-138;g__SFEL01;s__SFEL01 sp004557245
MAG010	97.99	0.57	0	2216112	38	109211	480630	39.5	2095	d__Bacteria;p__Firmicutes_A;c__Clostridia;o__Lachnospirales;f__Lachnospiraceae;g__SFDP01;s__
MAG011	97.8	0	0	2592869	44	84079	147469	49.5	2354	d__Bacteria;p__Fibrobacterota;c__Fibrobacteria;o__Fibrobacterales;f__Fibrobacteraceae;g__Fibrobacter_A;s__Fibrobacter_A sp002797675
MAG012	97.64	0.26	0	1858811	150	19336	85359	43.6	1778	d__Bacteria;p__Firmicutes;c__Bacilli;o__Lactobacillales;f__Lactobacillaceae;g__Ligilactobacillus;s__Ligilactobacillus ruminis
MAG013	97.2	0.7	0	2412868	68	87770	218989	39.4	2181	d__Bacteria;p__Spirochaetota;c__Spirochaetia;o__Treponematales;f__Treponemataceae;g__Treponema_D;s__
MAG014	97.18	0	0	1498386	81	45379	92810	48	1618	d__Archaea;p__Thermoplasmatota;c__Thermoplasmata;o__Methanomassiliicoccales;f__Methanomethylophilaceae;g__MX-02;s__MX-02 sp006954405
MAG015	96.98	0.92	66.67	1796213	134	20965	57046	48.5	1710	d__Bacteria;p__Firmicutes_C;c__Negativicutes;o__Acidaminococcales;f__Acidaminococcaceae;g__Phascolarctobacterium_A;s__Phascolarctobacterium_A succinatutens
MAG016	96.77	0.4	0	1624870	72	30912	89658	48.4	1566	d__Bacteria;p__Firmicutes_A;c__Clostridia_A;o__Christensenellales;f__CAG-138;g__;s__
MAG017	96.47	2.03	14.29	2326655	119	27990	109133	48.6	2165	d__Bacteria;p__Firmicutes_A;c__Clostridia;o__Lachnospirales;f__Lachnospiraceae;g__UBA7050;s__
MAG018	96.27	0.23	0	2846210	102	61995	184778	39	2559	d__Bacteria;p__Spirochaetota;c__Spirochaetia;o__Treponematales;f__Treponemataceae;g__Treponema_D;s__
MAG019	96.1	0.38	0	2313579	69	44133	127515	48.7	1902	d__Bacteria;p__Bacteroidota;c__Bacteroidia;o__Bacteroidales;f__Muribaculaceae;g__CAG-485;s__CAG-485 sp004553095
MAG020	96.07	1.12	0	1143597	59	37054	123877	35.3	1045	d__Bacteria;p__Firmicutes;c__Bacilli;o__RFN20;f__CAG-826;g__;s__
MAG021	96	2.67	0	1918639	144	27764	142668	31.1	2063	d__Bacteria;p__Firmicutes;c__Bacilli;o__ML615J-28;f__CAG-313;g__UMGS1109;s__UMGS1109 sp900548675
MAG022	95.97	1.34	0	2364314	85	44308	142631	44	2180	d__Bacteria;p__Firmicutes_A;c__Clostridia;o__Lachnospirales;f__Lachnospiraceae;g__Coprococcus_A;s__Coprococcus_A catus
MAG023	95.81	0.22	0	1674400	131	18767	52510	51.7	1603	d__Bacteria;p__Firmicutes_A;c__Clostridia;o__Oscillospirales;f__Oscillospiraceae;g__;s__
MAG024	95.56	1.34	0	1797011	156	19441	45216	53.6	1716	d__Bacteria;p__Firmicutes_A;c__Clostridia_A;o__Christensenellales;f__CAG-138;g__SFEL01;s__SFEL01 sp004557245
MAG025	95.43	0	0	3418252	66	84322	237929	40.9	2764	d__Bacteria;p__Bacteroidota;c__Bacteroidia;o__Bacteroidales;f__Paludibacteraceae;g__UBA1723;s__UBA1723 sp002392915
MAG026	95.25	0.67	0	2055901	65	45168	143366	56.8	1941	d__Bacteria;p__Firmicutes_A;c__Clostridia;o__Oscillospirales;f__Oscillospiraceae;g__;s__
MAG027	95.24	0.95	0	3871373	91	115766	387440	41.6	3620	d__Bacteria;p__Bacteroidota;c__Bacteroidia;o__Bacteroidales;f__UBA3824;g__UBA3824;s__
MAG028	95.04	0	0	1767378	66	41749	157595	42.7	1721	d__Bacteria;p__Firmicutes_A;c__Clostridia;o__Peptostreptococcales;f__Anaerovoracaceae;g__UMGS973;s__
MAG029	94.97	1.9	25	2163215	83	68191	241263	61	2058	d__Bacteria;p__Firmicutes_A;c__Clostridia;o__Oscillospirales;f__Oscillospiraceae;g__Evtepia;s__Evtepia sp004551945
MAG030	94.87	1.17	0	2862397	214	24054	104993	38.9	2610	d__Bacteria;p__Spirochaetota;c__Spirochaetia;o__Treponematales;f__Treponemataceae;g__Treponema_D;s__
MAG031	94.77	0.7	33.33	2225856	47	69567	191516	39.9	1890	d__Bacteria;p__Spirochaetota;c__Spirochaetia;o__Treponematales;f__Treponemataceae;g__Treponema_D;s__Treponema_D berlinense
MAG032	94.67	0	0	2387496	149	25342	127217	37.2	2174	d__Bacteria;p__Spirochaetota;c__Spirochaetia;o__Treponematales;f__Treponemataceae;g__Treponema_D;s__
MAG033	94.63	0	0	1331174	17	212292	279790	39.7	1263	d__Bacteria;p__Firmicutes_A;c__Clostridia;o__Oscillospirales;f__Ruminococcaceae;g__UBA1375;s__
MAG034	94.52	0.67	0	2278095	282	13657	78201	41.9	2301	d__Bacteria;p__Firmicutes_A;c__Clostridia;o__Lachnospirales;f__Lachnospiraceae;g__Frisingicoccus;s__
MAG035	94.51	0	0	926045	18	136783	209431	35.1	916	d__Bacteria;p__Proteobacteria;c__Alphaproteobacteria;o__Rs-D84;f__;g__;s__
MAG036	94.39	0	0	1847750	181	13351	71166	52.4	1741	d__Bacteria;p__Firmicutes_A;c__Clostridia;o__Oscillospirales;f__Acutalibacteraceae;g__CAG-177;s__CAG-177 sp003514385
MAG037	94.38	1.12	0	1361918	31	86412	222077	25.9	1397	d__Bacteria;p__Firmicutes;c__Bacilli;o__RF39;f__CAG-302;g__CAG-914;s__CAG-914 sp000437895
MAG038	94.35	0.16	0	1315500	43	44923	171631	49.4	1178	d__Bacteria;p__Firmicutes_A;c__Clostridia_A;o__Christensenellales;f__CAG-917;g__CAG-1138;s__CAG-1138 sp000434675
MAG039	94.09	0	0	1874831	142	22011	100171	42.5	1675	d__Bacteria;p__Bacteroidota;c__Bacteroidia;o__Bacteroidales;f__P3;g__UBA3388;s__UBA3388 sp004551865
MAG040	94.05	0	0	1823714	78	35840	122246	47	1566	d__Bacteria;p__Bacteroidota;c__Bacteroidia;o__Bacteroidales;f__UBA932;g__UBA1232;s__UBA1232 sp004561775
MAG041	93.96	5.59	0	2218692	69	51645	211365	38.2	1902	d__Bacteria;p__Spirochaetota;c__Spirochaetia;o__Treponematales;f__Treponemataceae;g__Treponema_D;s__
MAG042	93.94	0	0	2356747	211	21477	109811	43.1	2089	d__Bacteria;p__Spirochaetota;c__Spirochaetia;o__Treponematales;f__Treponemataceae;g__Treponema_D;s__
MAG043	93.93	1.41	0	2760446	137	32915	123723	49.3	2461	d__Bacteria;p__Firmicutes_A;c__Clostridia;o__Lachnospirales;f__Lachnospiraceae;g__Acetatifactor;s__
MAG044	93.86	0.81	0	1551137	107	21626	92466	50.3	1434	d__Bacteria;p__Firmicutes_A;c__Clostridia_A;o__Christensenellales;f__CAG-138;g__PeH17;s__PeH17 sp900542285
MAG045	93.85	0	0	1739928	36	88620	185572	52.1	1609	d__Bacteria;p__Firmicutes_A;c__Clostridia;o__Oscillospirales;f__CAG-382;g__SFLA01;s__SFLA01 sp004553575
MAG046	93.79	0	0	1815524	153	17585	55728	37.1	1646	d__Bacteria;p__Firmicutes_A;c__Clostridia;o__Oscillospirales;f__Ruminococcaceae;g__Ruminococcus;s__Ruminococcus sp002438605
MAG047	93.76	0.63	100	2277304	118	29928	96549	52.9	1882	d__Bacteria;p__Bacteroidota;c__Bacteroidia;o__Bacteroidales;f__UBA932;g__RC9;s__
MAG048	93.72	0.22	50	4090155	387	15316	61826	51.4	3973	d__Bacteria;p__Proteobacteria;c__Gammaproteobacteria;o__Enterobacterales;f__Enterobacteriaceae;g__Escherichia;s__Escherichia flexneri
MAG049	93.71	0.92	0	2219914	60	69620	140109	39.4	1968	d__Bacteria;p__Spirochaetota;c__Spirochaetia;o__Treponematales;f__Treponemataceae;g__Treponema_D;s__
MAG050	93.71	1.18	75	2250433	43	90434	169823	37.9	1965	d__Bacteria;p__Spirochaetota;c__Spirochaetia;o__Treponematales;f__Treponemataceae;g__Treponema_D;s__
MAG051	93.55	0.99	0	4309053	240	44079	122895	27.6	4212	d__Bacteria;p__Firmicutes_A;c__Clostridia;o__Clostridiales;f__Clostridiaceae;g__Clostridium;s__
MAG052	93.51	1.01	50	2950307	248	20010	61123	40.5	2601	d__Bacteria;p__Firmicutes_A;c__Clostridia;o__UMGS1810;f__UMGS1810;g__;s__
MAG053	93.47	0.7	0	2477877	115	37454	115802	36	2158	d__Bacteria;p__Spirochaetota;c__Spirochaetia;o__Treponematales;f__Treponemataceae;g__Treponema_D;s__
MAG054	93.46	0	0	2744769	97	42447	188501	47.7	2395	d__Bacteria;p__Bacteroidota;c__Bacteroidia;o__Bacteroidales;f__Bacteroidaceae;g__UBA4334;s__UBA4334 sp900316975
MAG055	93.36	0	0	2073545	48	72612	191811	57	1990	d__Bacteria;p__Firmicutes_A;c__Clostridia_A;o__Christensenellales;f__CAG-138;g__UBA1685;s__UBA1685 sp004560435
MAG056	93.33	0.32	0	1996968	217	13769	56069	43.5	1979	d__Bacteria;p__Firmicutes;c__Bacilli;o__Erysipelotrichales;f__Erysipelotrichaceae;g__Bulleidia;s__
MAG057	93.32	0.65	0	1763525	180	15829	92339	38.5	1800	d__Bacteria;p__Firmicutes_A;c__Clostridia;o__Lachnospirales;f__Lachnospiraceae;g__Bariatricus;s__Bariatricus sp004560705
MAG058	93.32	1.25	20	2114315	179	18017	112202	44.6	2069	d__Bacteria;p__Firmicutes;c__Bacilli;o__Lactobacillales;f__Lactobacillaceae;g__Lactobacillus;s__Lactobacillus amylovorus
MAG059	93.2	5.57	40	1952437	158	22647	89082	59.9	1935	d__Bacteria;p__Firmicutes_A;c__Clostridia;o__Oscillospirales;f__Oscillospiraceae;g__Oscillibacter;s__
MAG060	93.2	0	0	2202634	62	70124	293287	53.3	1795	d__Bacteria;p__Bacteroidota;c__Bacteroidia;o__Bacteroidales;f__UBA932;g__RC9;s__RC9 sp004552965
MAG061	93.15	0	0	1270149	69	35508	78755	45.1	1181	d__Bacteria;p__Firmicutes_A;c__Clostridia_A;o__Christensenellales;f__CAG-314;g__SFEB01;s__SFEB01 sp004558105
MAG062	93.11	0.02	100	1916973	143	22076	70833	47.7	1769	d__Bacteria;p__Firmicutes_A;c__Clostridia;o__Oscillospirales;f__Acutalibacteraceae;g__UBA6857;s__
MAG063	93.1	1.75	40	1668735	158	15104	42578	47.4	1485	d__Bacteria;p__Bacteroidota;c__Bacteroidia;o__Bacteroidales;f__UBA932;g__UBA1232;s__UBA1232 sp004561775
MAG064	92.98	1.69	0	1225540	62	32549	116118	27.5	1212	d__Bacteria;p__Firmicutes;c__Bacilli;o__RF39;f__CAG-611;g__CAG-877;s__
MAG065	92.9	0	0	1888071	215	14361	75627	55.4	1905	d__Bacteria;p__Firmicutes_A;c__Clostridia;o__Lachnospirales;f__Lachnospiraceae;g__UBA1712;s__
MAG066	92.9	1.05	66.67	1552471	124	19755	76831	44.3	1471	d__Bacteria;p__Firmicutes_A;c__Clostridia;o__Oscillospirales;f__Butyricicoccaceae;g__;s__
MAG067	92.88	0	0	1560740	174	11174	31997	53.7	1542	d__Bacteria;p__Firmicutes_A;c__Clostridia_A;o__Christensenellales;f__CAG-314;g__SFEB01;s__SFEB01 sp004558105
MAG068	92.88	0.67	0	2032049	109	31284	130546	51.8	1983	d__Bacteria;p__Firmicutes_A;c__Clostridia;o__Oscillospirales;f__Butyricicoccaceae;g__Butyricicoccus_A;s__Butyricicoccus_A sp002395695
MAG069	92.88	0.81	100	1274680	53	50397	138902	44.3	1207	d__Bacteria;p__Elusimicrobiota;c__Elusimicrobia;o__Elusimicrobiales;f__Elusimicrobiaceae;g__UBA1436;s__UBA1436 sp002329395
MAG070	92.81	1.32	20	2369770	218	18436	77579	47.9	2045	d__Bacteria;p__Bacteroidota;c__Bacteroidia;o__Bacteroidales;f__UBA3663;g__UBA3663;s__
MAG071	92.72	0.81	0	1419218	80	34668	86707	47.2	1311	d__Bacteria;p__Firmicutes_A;c__Clostridia_A;o__Christensenellales;f__CAG-917;g__CAG-349;s__CAG-349 sp001940895
MAG072	92.69	0.93	0	1904547	129	25577	107968	34.9	1703	d__Bacteria;p__Spirochaetota;c__Spirochaetia;o__Treponematales;f__Treponemataceae;g__Treponema_D;s__
MAG073	92.66	0	0	1473475	98	22247	70582	51.6	1390	d__Bacteria;p__Firmicutes_A;c__Clostridia_A;o__Christensenellales;f__CAG-138;g__SFDB01;s__SFDB01 sp004558825
MAG074	92.34	0	0	1215630	52	34557	77627	44.9	1145	d__Bacteria;p__Firmicutes_A;c__Clostridia_A;o__Christensenellales;f__CAG-314;g__SFEB01;s__SFEB01 sp004558105
MAG075	92.31	0	0	1489692	102	20435	62812	51.4	1411	d__Bacteria;p__Firmicutes_A;c__Clostridia_A;o__Christensenellales;f__CAG-138;g__SFDB01;s__SFDB01 sp004558825
MAG076	92.28	0.67	0	1867820	146	18816	55441	55	1816	d__Bacteria;p__Firmicutes_A;c__Clostridia;o__Oscillospirales;f__Butyricicoccaceae;g__;s__
MAG077	92.26	0.5	50	2763789	128	35150	111983	47.6	2245	d__Bacteria;p__Bacteroidota;c__Bacteroidia;o__Bacteroidales;f__Muribaculaceae;g__C941;s__C941 sp004557565
MAG078	92.2	0	0	3071740	291	14602	49336	46.2	2852	d__Bacteria;p__Firmicutes_A;c__Clostridia;o__Peptostreptococcales;f__Anaerovoracaceae;g__UMGS973;s__
MAG079	92.2	0	0	1676919	91	27978	158102	42.7	1642	d__Bacteria;p__Firmicutes_A;c__Clostridia;o__Oscillospirales;f__Ruminococcaceae;g__Ruminococcus;s__Ruminococcus flavefaciens_E
MAG080	92.19	0	0	1842620	132	23853	93879	37.5	1760	d__Bacteria;p__Firmicutes_A;c__Clostridia;o__Lachnospirales;f__Lachnospiraceae;g__UBA2868;s__UBA2868 sp004552595
MAG081	92.13	0	0	1210518	109	14891	47625	34.7	1141	d__Bacteria;p__Firmicutes;c__Bacilli;o__RFN20;f__CAG-288;g__UBA6879;s__
MAG082	92.11	1.12	33.33	2086856	229	13034	69360	41.7	2069	d__Bacteria;p__Firmicutes_A;c__Clostridia;o__Lachnospirales;f__Lachnospiraceae;g__Frisingicoccus;s__
MAG083	92.06	0	0	2013659	82	35371	121523	45.9	1805	d__Bacteria;p__Firmicutes_A;c__Clostridia;o__Oscillospirales;f__Acutalibacteraceae;g__CAG-488;s__
MAG084	92	0	0	2179224	103	41014	112251	36.3	1863	d__Bacteria;p__Spirochaetota;c__Spirochaetia;o__Treponematales;f__Treponemataceae;g__Treponema_D;s__
MAG085	91.94	1.88	0	1818403	91	36516	95398	36.7	1596	d__Bacteria;p__Bacteroidota;c__Bacteroidia;o__Bacteroidales;f__Paludibacteraceae;g__SFVR01;s__
MAG086	91.72	0	0	2350737	91	35197	201773	49.1	1937	d__Bacteria;p__Bacteroidota;c__Bacteroidia;o__Bacteroidales;f__Muribaculaceae;g__SFRY01;s__SFRY01 sp004562065
MAG087	91.64	0.37	0	2285637	199	15065	39510	50.7	1813	d__Bacteria;p__Bacteroidota;c__Bacteroidia;o__Bacteroidales;f__Bacteroidaceae;g__UBA4372;s__
MAG088	91.63	3.5	11.11	3034544	228	26841	174145	43.5	2980	d__Bacteria;p__Firmicutes_A;c__Clostridia;o__Lachnospirales;f__Lachnospiraceae;g__CAG-95;s__
MAG089	91.6	1.94	20	2810645	241	19091	76419	38.7	2660	d__Bacteria;p__Firmicutes_A;c__Clostridia;o__Lachnospirales;f__Lachnospiraceae;g__UBA2882;s__
MAG090	91.6	0.63	50	2337273	124	39219	191651	46.7	2230	d__Bacteria;p__Firmicutes_A;c__Clostridia;o__Lachnospirales;f__Lachnospiraceae;g__Marvinbryantia;s__
MAG091	91.58	0.71	0	1680326	98	24830	103955	33.3	1702	d__Bacteria;p__Firmicutes;c__Bacilli;o__Erysipelotrichales;f__Erysipelotrichaceae;g__;s__
MAG092	91.57	1.12	0	1095994	33	60381	107828	34.8	937	d__Bacteria;p__Firmicutes_A;c__Clostridia_A;o__Christensenellales;f__UBA1242;g__UBA11490;s__
MAG093	91.57	1.12	0	754487	28	38028	100404	32.5	720	d__Bacteria;p__Firmicutes_A;c__Clostridia_A;o__Christensenellales;f__UBA1242;g__UMGS687;s__
MAG094	91.43	2.68	25	1825811	187	14603	63763	57	1851	d__Bacteria;p__Firmicutes_A;c__Clostridia;o__Oscillospirales;f__Oscillospiraceae;g__CAG-170;s__
MAG095	91.35	1.17	0	2597544	235	18765	75850	35.7	2442	d__Bacteria;p__Spirochaetota;c__Spirochaetia;o__Treponematales;f__Treponemataceae;g__Treponema_D;s__
MAG096	91.3	4.49	25	2943885	198	29918	126409	44.1	2804	d__Bacteria;p__Firmicutes_A;c__Clostridia;o__Lachnospirales;f__Lachnospiraceae;g__CAG-95;s__
MAG097	91.28	0.67	100	2041939	150	21258	72873	51.8	1974	d__Bacteria;p__Firmicutes_A;c__Clostridia;o__Oscillospirales;f__Butyricicoccaceae;g__Butyricicoccus_A;s__Butyricicoccus_A sp004555915
MAG098	91.13	0	0	1319660	92	29123	58363	44.8	1267	d__Archaea;p__Thermoplasmatota;c__Thermoplasmata;o__Methanomassiliicoccales;f__Methanomethylophilaceae;g__MX-02;s__
MAG099	91.13	0.87	50	1346913	88	20060	93489	54.3	1357	d__Bacteria;p__Firmicutes_A;c__Clostridia_A;o__Christensenellales;f__CAG-314;g__SFEB01;s__SFEB01 sp004558105
MAG100	91.01	2.41	0	2081441	143	27094	124720	25.6	2428	d__Bacteria;p__Firmicutes;c__Bacilli;o__RF39;f__CAG-1000;g__UMGS1217;s__
MAG101	90.98	0.81	37.5	2500237	232	15238	34685	49.8	2010	d__Bacteria;p__Bacteroidota;c__Bacteroidia;o__Bacteroidales;f__Bacteroidaceae;g__Prevotella;s__Prevotella sp002251365
MAG102	90.94	1.45	0	2126153	286	11936	45771	44.8	2065	d__Bacteria;p__Firmicutes_A;c__Clostridia;o__Oscillospirales;f__Ruminococcaceae;g__Ruminococcus_C;s__
MAG103	90.92	0	0	2041500	143	23942	78565	49.4	1767	d__Bacteria;p__Firmicutes_A;c__Clostridia;o__Oscillospirales;f__Acutalibacteraceae;g__RUG806;s__
MAG104	90.85	0.84	50	1812571	215	11453	65483	52.4	1748	d__Bacteria;p__Firmicutes_A;c__Clostridia;o__Oscillospirales;f__Acutalibacteraceae;g__CAG-177;s__CAG-177 sp003514385
MAG105	90.79	0.87	0	2912461	53	83983	183441	51.7	2302	d__Bacteria;p__Bacteroidota;c__Bacteroidia;o__Bacteroidales;f__UBA932;g__RC9;s__RC9 sp000433355
MAG106	90.76	0.48	0	1835136	128	24977	88300	55.4	1512	d__Bacteria;p__Bacteroidota;c__Bacteroidia;o__Bacteroidales;f__UBA932;g__RC9;s__RC9 sp004554455
MAG107	90.75	0.34	0	2453789	239	14374	62235	63.3	2311	d__Bacteria;p__Firmicutes_A;c__Clostridia;o__Oscillospirales;f__Butyricicoccaceae;g__;s__
MAG108	90.72	0	0	1965718	170	16652	49155	46.5	1852	d__Bacteria;p__Firmicutes_A;c__Clostridia;o__Oscillospirales;f__Acutalibacteraceae;g__CAG-177;s__
MAG109	90.67	2.28	50	2562543	246	14796	66270	57.8	2397	d__Bacteria;p__Firmicutes_A;c__Clostridia_A;o__Christensenellales;f__CAG-74;g__Firm-11;s__
MAG110	90.63	0.47	57.14	2325672	137	36746	85659	41.1	2154	d__Bacteria;p__Spirochaetota;c__Spirochaetia;o__Treponematales;f__Treponemataceae;g__Treponema_D;s__
MAG111	90.6	1.9	25	2597420	164	33883	106608	44.8	2517	d__Bacteria;p__Firmicutes_A;c__Clostridia;o__Lachnospirales;f__Lachnospiraceae;g__Coprococcus_A;s__
MAG112	90.59	0.02	100	1924284	56	58703	218618	54	1641	d__Bacteria;p__Bacteroidota;c__Bacteroidia;o__Bacteroidales;f__UBA932;g__RC9;s__
MAG113	90.56	0.23	0	2186971	147	25310	92848	39.6	1861	d__Bacteria;p__Spirochaetota;c__Spirochaetia;o__Treponematales;f__Treponemataceae;g__Treponema_D;s__
MAG114	90.53	0	0	2136253	164	20041	138673	38.7	1811	d__Bacteria;p__Spirochaetota;c__Spirochaetia;o__Treponematales;f__Treponemataceae;g__Treponema_D;s__
MAG115	90.51	1.18	0	2076328	305	8811	34133	64.1	1938	d__Bacteria;p__Desulfobacterota;c__Desulfovibrionia;o__Desulfovibrionales;f__Desulfovibrionaceae;g__Desulfovibrio;s__Desulfovibrio piger
MAG116	90.48	0.44	0	2482717	167	22892	72633	47.9	2098	d__Bacteria;p__Bacteroidota;c__Bacteroidia;o__Bacteroidales;f__Muribaculaceae;g__C941;s__C941 sp004559845
MAG117	90.48	0.24	0	1568688	167	15819	52458	47.3	1396	d__Bacteria;p__Bacteroidota;c__Bacteroidia;o__Bacteroidales;f__UBA932;g__UBA1232;s__UBA1232 sp004561775
MAG118	90.45	0	0	1113356	76	17440	77124	35.1	1022	d__Bacteria;p__Firmicutes;c__Bacilli;o__RFN20;f__CAG-826;g__;s__
MAG119	90.43	0	0	1780931	219	11216	57005	55.8	1638	d__Bacteria;p__Firmicutes_C;c__Negativicutes;o__Veillonellales;f__Megasphaeraceae;g__Megasphaera;s__Megasphaera sp000417505
MAG120	90.42	0.87	100	2822383	242	19444	71872	44	2499	d__Bacteria;p__Firmicutes_A;c__Clostridia;o__Lachnospirales;f__Lachnospiraceae;g__Coprococcus;s__
MAG121	90.32	0	0	1922520	140	24144	94995	42.3	1724	d__Bacteria;p__Bacteroidota;c__Bacteroidia;o__Bacteroidales;f__P3;g__UBA3388;s__UBA3388 sp004551865
MAG122	90.16	0.02	100	1582171	35	64996	206745	45.3	1480	d__Bacteria;p__Firmicutes_A;c__Clostridia;o__Oscillospirales;f__CAG-272;g__CAG-841;s__CAG-841 sp000437375
MAG123	90.05	1.09	33.33	1916635	45	66461	134178	51.8	1548	d__Bacteria;p__Bacteroidota;c__Bacteroidia;o__Bacteroidales;f__Paludibacteraceae;g__RF16;s__
MAG124	89.99	0	0	1852806	97	35000	92882	40.7	1757	d__Bacteria;p__Firmicutes_A;c__Clostridia;o__Lachnospirales;f__Lachnospiraceae;g__Butyrivibrio_A;s__
MAG125	89.93	0	0	1905766	74	48662	328104	40.6	1822	d__Bacteria;p__Firmicutes_A;c__Clostridia;o__Lachnospirales;f__Lachnospiraceae;g__Butyrivibrio_A;s__
MAG126	89.91	2.05	14.29	1315903	185	9266	21783	34.8	1488	d__Bacteria;p__Campylobacterota;c__Campylobacteria;o__Campylobacterales;f__Campylobacteraceae;g__Campylobacter;s__Campylobacter lanienae
MAG127	89.82	0	0	1581118	152	17266	59428	50.1	1494	d__Bacteria;p__Firmicutes_A;c__Clostridia_A;o__Christensenellales;f__CAG-138;g__PeH17;s__PeH17 sp900542285
MAG128	89.8	0.31	50	2065318	265	9270	39896	48.8	1779	d__Bacteria;p__Bacteroidota;c__Bacteroidia;o__Bacteroidales;f__Muribaculaceae;g__C941;s__C941 sp004559845
MAG129	89.79	0.34	0	1842469	211	11641	65511	44.9	1782	d__Bacteria;p__Firmicutes_A;c__Clostridia;o__Oscillospirales;f__Ruminococcaceae;g__Ruminiclostridium_E;s__
MAG130	89.76	0.48	0	1759032	141	21169	88996	55.6	1468	d__Bacteria;p__Bacteroidota;c__Bacteroidia;o__Bacteroidales;f__UBA932;g__RC9;s__RC9 sp004554455
MAG131	89.66	0	0	1851891	127	20448	110297	39.9	1635	d__Bacteria;p__Spirochaetota;c__Spirochaetia;o__Treponematales;f__Treponemataceae;g__Treponema_D;s__
MAG132	89.64	0	0	2070185	101	35484	114668	41.7	1832	d__Bacteria;p__Spirochaetota;c__Spirochaetia;o__Treponematales;f__Treponemataceae;g__Treponema_D;s__
MAG133	89.63	0.93	0	2724308	298	13863	47940	38.9	2533	d__Bacteria;p__Spirochaetota;c__Spirochaetia;o__Treponematales;f__Treponemataceae;g__Treponema_D;s__
MAG134	89.52	0.81	0	1345563	62	30218	129258	53.8	1344	d__Bacteria;p__Firmicutes_A;c__Clostridia_A;o__Christensenellales;f__DTU072;g__CAG-1782;s__
MAG135	89.52	0.83	0	1864794	36	179157	375363	47.1	1403	d__Archaea;p__Thermoplasmatota;c__Thermoplasmata;o__Methanomassiliicoccales;f__Methanomethylophilaceae;g__MX-02;s__
MAG136	89.49	0	0	1397364	177	10696	34242	41.2	1332	d__Bacteria;p__Firmicutes_A;c__Clostridia_A;o__Christensenellales;f__CAG-1252;g__;s__
MAG137	89.42	0.37	0	2643913	158	23179	120614	50.6	1936	d__Bacteria;p__Bacteroidota;c__Bacteroidia;o__Bacteroidales;f__Bacteroidaceae;g__Prevotella;s__Prevotella sp004556065
MAG138	89.37	0.95	0	1900954	139	21016	118909	55.3	1579	d__Bacteria;p__Bacteroidota;c__Bacteroidia;o__Bacteroidales;f__UBA932;g__RC9;s__RC9 sp004554455
MAG139	89.35	0.07	0	1867229	144	19143	53826	61.4	1703	d__Bacteria;p__Firmicutes_A;c__Clostridia_A;o__Christensenellales;f__CAG-138;g__CAG-1024;s__CAG-1024 sp004554165
MAG140	89.33	2.67	0	1852343	135	22985	61148	28.5	1838	d__Bacteria;p__Firmicutes;c__Bacilli;o__ML615J-28;f__CAG-698;g__CAG-698;s__
MAG141	89.33	1.12	0	1259472	85	21954	228623	28.4	1384	d__Bacteria;p__Firmicutes;c__Bacilli;o__RF39;f__CAG-302;g__CAG-762;s__CAG-762 sp900551315
MAG142	89.29	0.95	50	1775088	151	17650	63964	55.6	1475	d__Bacteria;p__Bacteroidota;c__Bacteroidia;o__Bacteroidales;f__UBA932;g__RC9;s__RC9 sp004554455
MAG143	89.26	0	0	1830332	68	50592	124415	37.8	1679	d__Bacteria;p__Firmicutes_A;c__Clostridia;o__Oscillospirales;f__Acutalibacteraceae;g__;s__
MAG144	89.19	0.67	0	1650076	77	35322	153119	47	1610	d__Bacteria;p__Firmicutes_A;c__Clostridia;o__Oscillospirales;f__Ruminococcaceae;g__UMGS1668;s__UMGS1668 sp004556975
MAG145	89.11	0.68	0	2013556	92	35785	120895	59	1588	d__Bacteria;p__Verrucomicrobiota;c__Lentisphaeria;o__UBA1407;f__UBA1407;g__UBA1724;s__UBA1724 sp900548225
MAG146	89.04	0.67	100	1553140	57	43565	213403	47.1	1528	d__Bacteria;p__Firmicutes_A;c__Clostridia;o__Oscillospirales;f__Ruminococcaceae;g__UMGS1668;s__UMGS1668 sp004556975
MAG147	88.99	3.34	45.45	2004112	135	24865	82561	36.5	1790	d__Bacteria;p__Firmicutes_A;c__Clostridia;o__Lachnospirales;f__Lachnospiraceae;g__Coprococcus;s__
MAG148	88.97	4	54.55	1497113	88	24048	107308	54.9	1441	d__Bacteria;p__Firmicutes_A;c__Clostridia;o__Oscillospirales;f__Oscillospiraceae;g__F23-B02;s__F23-B02 sp004556755
MAG149	88.92	1.34	0	1748134	289	7294	32770	45.3	1721	d__Bacteria;p__Firmicutes_A;c__Clostridia;o__Oscillospirales;f__Acutalibacteraceae;g__UBA6857;s__
MAG150	88.86	7.26	23.08	2529418	238	16317	40811	65.3	2370	d__Bacteria;p__Firmicutes_A;c__Clostridia_A;o__Christensenellales;f__CAG-74;g__;s__
MAG151	88.84	0	0	1267091	117	14741	37535	48.4	1170	d__Bacteria;p__Firmicutes_A;c__Clostridia_A;o__Christensenellales;f__CAG-917;g__CAG-349;s__CAG-349 sp003539515
MAG152	88.81	0	0	1896896	39	75608	195630	51.7	1811	d__Bacteria;p__Firmicutes_A;c__Clostridia_A;o__Christensenellales;f__CAG-138;g__SFEL01;s__
MAG153	88.8	2.19	57.14	1484084	160	13855	60746	44	1439	d__Bacteria;p__Firmicutes_A;c__Clostridia;o__Lachnospirales;f__Lachnospiraceae;g__UBA1712;s__
MAG154	88.76	0	0	1144073	98	16127	74801	34.9	1046	d__Bacteria;p__Firmicutes;c__Bacilli;o__RFN20;f__CAG-826;g__UBA4855;s__
MAG155	88.76	1.12	0	1096839	37	35326	88448	27.3	973	d__Bacteria;p__Firmicutes;c__Bacilli;o__RFN20;f__CAG-288;g__UBA6879;s__
MAG156	88.74	0.74	0	2528929	202	17807	69578	55.1	2108	d__Bacteria;p__Bacteroidota;c__Bacteroidia;o__Bacteroidales;f__Bacteroidaceae;g__UBA4372;s__
MAG157	88.66	0.62	66.67	1929299	227	12141	40515	47.3	1844	d__Bacteria;p__Firmicutes_A;c__Clostridia;o__Oscillospirales;f__Acutalibacteraceae;g__UBA6857;s__
MAG158	88.6	0.81	0	1652349	122	20405	52020	49.9	1541	d__Bacteria;p__Firmicutes_A;c__Clostridia_A;o__Christensenellales;f__CAG-138;g__PeH17;s__PeH17 sp900542285
MAG159	88.51	1.82	12.5	3223732	260	22323	89325	50.1	2505	d__Bacteria;p__Verrucomicrobiota;c__Lentisphaeria;o__Victivallales;f__Victivallaceae;g__UBA1784;s__
MAG160	88.51	2.03	0	1923672	52	45301	118695	55.6	1690	d__Bacteria;p__Bacteroidota;c__Bacteroidia;o__Bacteroidales;f__Bacteroidaceae;g__Prevotella;s__Prevotella sp004556065
MAG161	88.41	1.48	0	1873550	158	17156	94581	46.1	1725	d__Bacteria;p__Firmicutes_A;c__Clostridia;o__Oscillospirales;f__Acutalibacteraceae;g__UBA6857;s__
MAG162	88.34	1.4	80	1707687	265	7796	26237	44.2	1652	d__Bacteria;p__Spirochaetota;c__Spirochaetia;o__Treponematales;f__Treponemataceae;g__Treponema_D;s__Treponema_D porcinum
MAG163	88.34	0	0	1389223	104	23123	95849	51.1	1374	d__Bacteria;p__Firmicutes_A;c__Clostridia;o__Oscillospirales;f__Oscillospiraceae;g__F23-B02;s__
MAG164	88.2	2.25	0	1413134	48	60734	130203	25.1	1406	d__Bacteria;p__Firmicutes;c__Bacilli;o__RF39;f__CAG-1000;g__CAG-533;s__CAG-533 sp900551105
MAG165	88.2	3.37	0	1027938	23	104047	211484	29	1056	d__Bacteria;p__Firmicutes;c__Bacilli;o__RF39;f__CAG-433;g__CAG-433;s__CAG-433 sp000433675
MAG166	88.17	1.67	57.14	1868747	233	10564	36538	50.5	1697	d__Bacteria;p__Bacteroidota;c__Bacteroidia;o__Bacteroidales;f__Bacteroidaceae;g__Prevotella;s__Prevotella sp004557285
MAG167	88.17	0.95	0	2336417	116	34792	116016	51.7	1930	d__Bacteria;p__Bacteroidota;c__Bacteroidia;o__Bacteroidales;f__UBA932;g__RC9;s__RC9 sp004552615
MAG168	88.09	2.71	16.67	2092740	158	21221	77433	40	2033	d__Bacteria;p__Firmicutes_A;c__Clostridia;o__Lachnospirales;f__Lachnospiraceae;g__992a;s__992a sp001940245
MAG169	88.08	0	0	1562642	132	16344	66892	50.3	1428	d__Bacteria;p__Bacteroidota;c__Bacteroidia;o__Bacteroidales;f__Paludibacteraceae;g__W0P28-013;s__W0P28-013 sp004557405
MAG170	87.99	0.8	0	1691951	108	25553	130004	35	1527	d__Archaea;p__Methanobacteriota;c__Methanobacteria;o__Methanobacteriales;f__Methanobacteriaceae;g__Methanobrevibacter;s__Methanobrevibacter sp900314635
MAG171	87.78	0.27	0	2545424	230	15223	55944	50.5	2335	d__Bacteria;p__Firmicutes_A;c__Clostridia_A;o__Christensenellales;f__CAG-74;g__SFHK01;s__
MAG172	87.77	1.4	0	2790157	166	41608	145075	38.6	2432	d__Bacteria;p__Spirochaetota;c__Spirochaetia;o__Treponematales;f__Treponemataceae;g__Treponema_D;s__
MAG173	87.74	0	0	1259343	101	19856	55909	48.1	1167	d__Bacteria;p__Firmicutes_A;c__Clostridia_A;o__Christensenellales;f__CAG-917;g__CAG-349;s__CAG-349 sp003539515
MAG174	87.59	0.24	0	1985214	148	19303	71752	54.6	1651	d__Bacteria;p__Bacteroidota;c__Bacteroidia;o__Bacteroidales;f__UBA932;g__RC9;s__
MAG175	87.53	1.51	33.33	2426133	222	17988	84763	52.7	2467	d__Bacteria;p__Firmicutes_A;c__Clostridia;o__Oscillospirales;f__Oscillospiraceae;g__CAG-170;s__
MAG176	87.53	0.7	0	2436124	88	60891	136170	38	2130	d__Bacteria;p__Spirochaetota;c__Spirochaetia;o__Treponematales;f__Treponemataceae;g__Treponema_D;s__
MAG177	87.4	0.34	0	2031374	224	12830	65219	61.6	1998	d__Bacteria;p__Firmicutes_A;c__Clostridia;o__Oscillospirales;f__Oscillospiraceae;g__Evtepia;s__
MAG178	87.37	0	0	1716223	123	20182	49584	49.6	1553	d__Bacteria;p__Bacteroidota;c__Bacteroidia;o__Bacteroidales;f__Paludibacteraceae;g__W0P28-013;s__W0P28-013 sp004557405
MAG179	87.25	0	0	2235871	43	90880	299120	48.6	2060	d__Bacteria;p__Firmicutes_A;c__Clostridia;o__Oscillospirales;f__Ruminococcaceae;g__Firm-04;s__
MAG180	87.22	0.48	0	1775030	141	20502	135180	55.5	1496	d__Bacteria;p__Bacteroidota;c__Bacteroidia;o__Bacteroidales;f__UBA932;g__RC9;s__RC9 sp004554455
MAG181	87.2	1.01	50	1490185	144	14433	65965	51.9	1557	d__Bacteria;p__Firmicutes_A;c__Clostridia;o__Oscillospirales;f__Ruminococcaceae;g__UMGS1668;s__
MAG182	87.17	0.36	66.67	2164093	243	11684	39011	50.9	1796	d__Bacteria;p__Bacteroidota;c__Bacteroidia;o__Bacteroidales;f__Bacteroidaceae;g__UBA4372;s__
MAG183	87.1	0	0	1360166	96	21080	61198	51.8	1291	d__Bacteria;p__Firmicutes_A;c__Clostridia_A;o__Christensenellales;f__CAG-138;g__SFDB01;s__
MAG184	87.08	0	0	726633	61	17537	48103	26.7	769	d__Bacteria;p__Firmicutes;c__Bacilli;o__RF39;f__CAG-611;g__UMGS1449;s__
MAG185	87.07	2.1	0	2410021	294	10751	51566	45.3	1915	d__Bacteria;p__Bacteroidota;c__Bacteroidia;o__Bacteroidales;f__Bacteroidaceae;g__Prevotella;s__Prevotella sp900548195
MAG186	87.04	0.7	0	1295184	102	21320	47414	48.1	1185	d__Bacteria;p__Firmicutes_A;c__Clostridia_A;o__Christensenellales;f__CAG-917;g__CAG-349;s__CAG-349 sp003539515
MAG187	86.99	1.08	0	1854892	67	41505	104384	42.6	1594	d__Bacteria;p__Bacteroidota;c__Bacteroidia;o__Bacteroidales;f__P3;g__UBA3388;s__
MAG188	86.98	0	0	1969092	138	21338	82315	53.6	1591	d__Bacteria;p__Bacteroidota;c__Bacteroidia;o__Bacteroidales;f__UBA932;g__RC9;s__RC9 sp004556005
MAG189	86.98	0.16	0	1733591	124	21196	67315	52.1	1472	d__Bacteria;p__Bacteroidota;c__Bacteroidia;o__Bacteroidales;f__UBA932;g__RC9;s__RC9 sp004552965
MAG190	86.97	0	0	1159198	65	33973	141202	25.7	1164	d__Bacteria;p__Firmicutes;c__Bacilli;o__RF39;f__CAG-1000;g__CAG-1000;s__CAG-1000 sp004552445
MAG191	86.89	1.12	100	1409161	167	11368	52332	55.3	1332	d__Bacteria;p__Firmicutes;c__Bacilli;o__RFN20;f__CAG-826;g__UBA733;s__
MAG192	86.89	0	0	1148468	111	15809	50016	34.8	1091	d__Bacteria;p__Firmicutes;c__Bacilli;o__RFN20;f__CAG-288;g__UBA6879;s__
MAG193	86.87	5.03	10	2025321	262	11223	82844	59.9	1958	d__Bacteria;p__Firmicutes_A;c__Clostridia;o__Oscillospirales;f__Oscillospiraceae;g__;s__
MAG194	86.84	1.05	0	1975293	112	28745	78944	36.5	1650	d__Bacteria;p__Spirochaetota;c__Spirochaetia;o__Treponematales;f__Treponemataceae;g__Treponema_D;s__
MAG195	86.74	4.49	20	1595659	95	32259	104659	25.8	1615	d__Bacteria;p__Firmicutes;c__Bacilli;o__RF39;f__CAG-1000;g__UBA11963;s__
MAG196	86.69	3.15	14.29	2703117	265	16604	54318	37.9	2495	d__Archaea;p__Thermoplasmatota;c__Thermoplasmata;o__Methanomassiliicoccales;f__Methanomethylophilaceae;g__ISO4-G1;s__
MAG197	86.69	5.87	20	1536273	249	7516	29216	56.2	1727	d__Bacteria;p__Firmicutes_A;c__Clostridia;o__Oscillospirales;f__Ruminococcaceae;g__HUN007;s__
MAG198	86.54	0.48	0	1492553	256	7030	29243	47.3	1415	d__Bacteria;p__Bacteroidota;c__Bacteroidia;o__Bacteroidales;f__UBA932;g__UBA1232;s__UBA1232 sp004561775
MAG199	86.54	0	0	2608472	142	28532	106312	48.8	2125	d__Bacteria;p__Bacteroidota;c__Bacteroidia;o__Bacteroidales;f__Bacteroidaceae;g__Prevotella;s__Prevotella sp002251245
MAG200	86.53	5.07	25	3582296	559	8046	36272	52.8	3303	d__Bacteria;p__Verrucomicrobiota;c__Lentisphaeria;o__Victivallales;f__UBA1829;g__UBA11452;s__UBA11452 sp003526375
MAG201	86.49	1.54	60	2122058	397	6382	24265	69.9	2124	d__Bacteria;p__Actinobacteriota;c__Actinomycetia;o__Mycobacteriales;f__Mycobacteriaceae;g__Corynebacterium;s__Corynebacterium xerosis
MAG202	86.46	2.23	0	3703418	109	53148	263715	61.4	2685	d__Bacteria;p__Verrucomicrobiota;c__Kiritimatiellae;o__RFP12;f__UBA1067;g__UBA1067;s__
MAG203	86.36	4.93	16.67	1815853	273	8168	31576	51	1875	d__Bacteria;p__Firmicutes_A;c__Clostridia;o__Oscillospirales;f__Oscillospiraceae;g__CAG-110;s__
MAG204	86.35	0	0	1359020	108	17739	50355	49.1	1285	d__Bacteria;p__Firmicutes_A;c__Clostridia;o__Oscillospirales;f__CAG-272;g__CAG-841;s__
MAG205	86.31	0	0	1838358	220	11769	70350	48.1	1723	d__Bacteria;p__Firmicutes_A;c__Clostridia;o__Oscillospirales;f__Acutalibacteraceae;g__UBA6857;s__
MAG206	86.3	3.15	20	2182206	200	16459	52356	38.2	1973	d__Bacteria;p__Spirochaetota;c__Spirochaetia;o__Treponematales;f__Treponemataceae;g__Treponema_D;s__
MAG207	86.21	0	0	1828809	182	14882	61715	43.6	1546	d__Bacteria;p__Bacteroidota;c__Bacteroidia;o__Bacteroidales;f__Bacteroidaceae;g__Prevotella;s__Prevotella sp002299275
MAG208	86.18	0.54	0	2416327	119	30386	75235	52.5	2111	d__Bacteria;p__Bacteroidota;c__Bacteroidia;o__Bacteroidales;f__WCHB1-69;g__F23-D06;s__F23-D06 sp900315705
MAG209	86.13	0	0	1687714	179	12758	75560	48	1601	d__Bacteria;p__Firmicutes_A;c__Clostridia;o__Oscillospirales;f__Acutalibacteraceae;g__UBA6857;s__
MAG210	86.1	1.9	0	1886131	241	10208	33999	46.3	1805	d__Bacteria;p__Firmicutes_A;c__Clostridia;o__Oscillospirales;f__Acutalibacteraceae;g__CAG-177;s__
MAG211	86.09	1.08	66.67	1770063	207	12981	46642	42.6	1647	d__Bacteria;p__Bacteroidota;c__Bacteroidia;o__Bacteroidales;f__P3;g__UBA3388;s__
MAG212	86.08	0.48	100	1981606	160	17224	49775	53.8	1650	d__Bacteria;p__Bacteroidota;c__Bacteroidia;o__Bacteroidales;f__UBA932;g__RC9;s__RC9 sp004552965
MAG213	86.02	1.08	100	2203771	114	32143	123351	44.6	1962	d__Bacteria;p__Bacteroidota;c__Bacteroidia;o__Bacteroidales;f__F082;g__F082;s__
MAG214	86.02	0	0	1911439	78	38385	130772	45.1	1616	d__Bacteria;p__Bacteroidota;c__Bacteroidia;o__Bacteroidales;f__F082;g__F082;s__
MAG215	85.96	1.12	0	1121794	70	26485	82845	27.4	1204	d__Bacteria;p__Firmicutes;c__Bacilli;o__RF39;f__CAG-611;g__CAG-710;s__
MAG216	85.95	0.48	0	1530561	161	13585	49829	47.3	1357	d__Bacteria;p__Bacteroidota;c__Bacteroidia;o__Bacteroidales;f__UBA932;g__UBA1232;s__UBA1232 sp004561775
MAG217	85.95	0.19	0	1979403	142	19097	44967	47	1618	d__Bacteria;p__Bacteroidota;c__Bacteroidia;o__Bacteroidales;f__Bacteroidaceae;g__Prevotella;s__Prevotella sp002251295
MAG218	85.71	0.55	0	3068144	80	63373	181174	50.6	2673	d__Bacteria;p__Fibrobacterota;c__Fibrobacteria;o__Fibrobacterales;f__Fibrobacteraceae;g__Fibrobacter;s__Fibrobacter sp900142475
MAG219	85.59	0	0	1400755	98	19816	81516	50.9	1376	d__Bacteria;p__Firmicutes_A;c__Clostridia;o__Oscillospirales;f__Oscillospiraceae;g__F23-B02;s__
MAG220	85.56	2.82	25	2397889	275	12376	41162	65.2	2320	d__Bacteria;p__Firmicutes_A;c__Clostridia_A;o__Christensenellales;f__CAG-74;g__;s__
MAG221	85.55	1.61	0	1248190	177	8699	31070	57	1393	d__Archaea;p__Thermoplasmatota;c__Thermoplasmata;o__Methanomassiliicoccales;f__Methanomethylophilaceae;g__Methanomethylophilus;s__Methanomethylophilus alvus
MAG222	85.51	0.7	0	1357551	92	24358	70813	47.8	1261	d__Bacteria;p__Firmicutes_A;c__Clostridia_A;o__Christensenellales;f__CAG-917;g__CAG-349;s__CAG-349 sp003539515
MAG223	85.48	0	0	1206733	132	11972	53262	58.7	1197	d__Bacteria;p__Bacteroidota;c__Bacteroidia;o__Bacteroidales;f__Paludibacteraceae;g__UBA1723;s__UBA1723 sp002371265
MAG224	85.48	0	0	3357479	59	82316	268965	40.9	2760	d__Bacteria;p__Firmicutes_A;c__Clostridia;o__Oscillospirales;f__Oscillospiraceae;g__ER4;s__
MAG225	85.47	0.68	0	1674252	266	8156	31085	64.9	1436	d__Bacteria;p__Verrucomicrobiota;c__Verrucomicrobiae;o__Opitutales;f__UBA953;g__W0P29-029;s__W0P29-029 sp004558035
MAG226	85.46	0	0	1381605	111	17980	87277	51.2	1385	d__Bacteria;p__Firmicutes_A;c__Clostridia;o__Oscillospirales;f__Oscillospiraceae;g__F23-B02;s__
MAG227	85.3	1.36	66.67	2080505	160	20719	63210	55.5	2006	d__Bacteria;p__Firmicutes_A;c__Clostridia;o__Oscillospirales;f__Butyricicoccaceae;g__UMGS1384;s__
MAG228	85.27	1.57	0	1713592	296	6781	29482	43.5	1554	d__Bacteria;p__Firmicutes_A;c__Clostridia;o__Oscillospirales;f__Ruminococcaceae;g__Ruminococcus;s__
MAG229	85.25	6.26	11.76	2039479	303	9552	52617	58.7	2093	d__Bacteria;p__Firmicutes_A;c__Clostridia;o__Oscillospirales;f__Oscillospiraceae;g__NK3B98;s__
MAG230	85.25	0.83	50	2017382	195	15079	69051	44	1989	d__Bacteria;p__Firmicutes_A;c__Clostridia;o__Lachnospirales;f__Lachnospiraceae;g__Dorea;s__
MAG231	85.19	0.09	0	1618591	324	5737	26240	60.9	1413	d__Bacteria;p__Actinobacteriota;c__Actinomycetia;o__Actinomycetales;f__Bifidobacteriaceae;g__Bifidobacterium;s__Bifidobacterium thermophilum
MAG232	85.13	0	0	1808165	88	33416	58238	54.5	1478	d__Bacteria;p__Bacteroidota;c__Bacteroidia;o__Bacteroidales;f__UBA932;g__RC9;s__
MAG233	85.08	5.16	25	1716093	235	9837	37124	51.9	1641	d__Bacteria;p__Bacteroidota;c__Bacteroidia;o__Bacteroidales;f__UBA932;g__RC9;s__RC9 sp004556005
MAG234	85.01	0.67	0	1525773	117	17839	58776	47	1553	d__Bacteria;p__Firmicutes_A;c__Clostridia;o__Oscillospirales;f__Ruminococcaceae;g__UMGS1668;s__UMGS1668 sp004556975
MAG235	84.97	0.7	0	1880722	36	108569	233562	43.1	1641	d__Bacteria;p__Spirochaetota;c__Spirochaetia;o__Treponematales;f__Treponemataceae;g__Treponema_D;s__Treponema_D porcinum
MAG236	84.94	1.1	0	2371582	161	20737	58442	52.6	2142	d__Bacteria;p__Fibrobacterota;c__Fibrobacteria;o__Fibrobacterales;f__Fibrobacteraceae;g__Fibrobacter;s__
MAG237	84.91	1.14	0	1640195	271	7287	30734	38.4	1787	d__Bacteria;p__Firmicutes;c__Bacilli;o__Lactobacillales;f__Lactobacillaceae;g__Lactobacillus;s__Lactobacillus amylovorus
MAG238	84.9	0	0	1576194	73	40197	104268	47.8	1502	d__Bacteria;p__Firmicutes_A;c__Clostridia;o__Oscillospirales;f__Acutalibacteraceae;g__;s__
MAG239	84.83	0	0	1010987	85	20770	116991	26.2	1072	d__Bacteria;p__Firmicutes;c__Bacilli;o__RF39;f__CAG-302;g__CAG-302;s__CAG-302 sp001916775
MAG240	84.75	0.37	0	2340458	156	20186	51155	50.3	1845	d__Bacteria;p__Bacteroidota;c__Bacteroidia;o__Bacteroidales;f__Bacteroidaceae;g__UBA4372;s__
MAG241	84.72	3.38	40	2340517	286	10167	67376	56.7	1908	d__Bacteria;p__Verrucomicrobiota;c__Kiritimatiellae;o__RFP12;f__UBA3636;g__;s__
MAG242	84.72	3.03	62.5	1696321	140	17413	58803	55	1480	d__Bacteria;p__Bacteroidota;c__Bacteroidia;o__Bacteroidales;f__UBA932;g__RC9;s__
MAG243	84.58	3.04	55.56	2159527	224	13461	44317	50.8	2003	d__Bacteria;p__Firmicutes_A;c__Clostridia;o__Oscillospirales;f__Oscillospiraceae;g__Evtepia;s__
MAG244	84.58	6.49	4.55	1837306	199	14274	75764	60.1	1840	d__Bacteria;p__Firmicutes_A;c__Clostridia;o__Lachnospirales;f__Lachnospiraceae;g__Acetatifactor;s__
MAG245	84.56	1.01	0	1863148	98	25928	81565	51.1	1710	d__Bacteria;p__Firmicutes_A;c__Clostridia;o__Oscillospirales;f__Ruminococcaceae;g__Firm-04;s__
MAG246	84.54	0.67	0	1943936	47	78552	274870	49.5	1723	d__Bacteria;p__Firmicutes_A;c__Clostridia_A;o__Christensenellales;f__CAG-138;g__PeH17;s__PeH17 sp000435055
MAG247	84.53	0.35	100	1623922	153	14650	57793	34.9	1482	d__Bacteria;p__Spirochaetota;c__Spirochaetia;o__Treponematales;f__Treponemataceae;g__Treponema_D;s__
MAG248	84.43	2.46	0	1562517	268	7077	29062	51.5	1705	d__Bacteria;p__Firmicutes_A;c__Clostridia;o__Oscillospirales;f__Ruminococcaceae;g__UBA3818;s__UBA3818 sp002369315
MAG249	84.41	2.68	25	1787535	148	20072	53060	61.9	1739	d__Bacteria;p__Firmicutes_A;c__Clostridia;o__Oscillospirales;f__Oscillospiraceae;g__Evtepia;s__Evtepia sp004551945
MAG250	84.41	0.81	0	1467404	86	25005	66955	44.9	1293	d__Bacteria;p__Bacteroidota;c__Bacteroidia;o__Bacteroidales;f__Paludibacteraceae;g__RF16;s__
MAG251	84.22	0.89	100	1773090	225	9617	58975	47.9	1682	d__Bacteria;p__Firmicutes_A;c__Clostridia;o__Oscillospirales;f__Acutalibacteraceae;g__UBA6857;s__
MAG252	84.09	1.96	9.09	1760904	309	6873	45312	47	1823	d__Bacteria;p__Spirochaetota;c__Spirochaetia;o__Sphaerochaetales;f__Sphaerochaetaceae;g__UBA5920;s__
MAG253	84.08	2.71	0	1584781	173	12841	78124	43.6	1582	d__Bacteria;p__Firmicutes_A;c__Clostridia;o__Monoglobales;f__Monoglobaceae;g__;s__
MAG254	84	0	0	1961667	232	12234	48073	37.6	1960	d__Bacteria;p__Firmicutes_A;c__Clostridia_A;o__Christensenellales;f__Borkfalkiaceae;g__;s__
MAG255	84	0.84	50	1469211	180	12182	47157	41.9	1392	d__Bacteria;p__Firmicutes_A;c__Clostridia;o__Oscillospirales;f__Ruminococcaceae;g__;s__
MAG256	83.97	2.29	10	2897247	303	13142	57578	59.9	2483	d__Bacteria;p__Verrucomicrobiota;c__Kiritimatiellae;o__RFP12;f__UBA1067;g__UBA1067;s__
MAG257	83.96	0	0	2101544	317	8331	30605	45.5	2014	d__Bacteria;p__Firmicutes_A;c__Clostridia;o__Oscillospirales;f__Ruminococcaceae;g__Ruminococcus;s__
MAG258	83.94	0	0	1492044	44	66854	155310	54.7	1441	d__Bacteria;p__Firmicutes_A;c__Clostridia;o__Oscillospirales;f__Oscillospiraceae;g__F23-B02;s__F23-B02 sp004556755
MAG259	83.81	3.57	0	1717841	221	10807	43356	51.2	1558	d__Bacteria;p__Bacteroidota;c__Bacteroidia;o__Bacteroidales;f__UBA932;g__RC9;s__
MAG260	83.8	0	0	1867589	243	10598	32296	45.2	1618	d__Bacteria;p__Spirochaetota;c__Spirochaetia;o__Treponematales;f__Treponemataceae;g__Treponema_D;s__
MAG261	83.78	0.68	0	2296733	205	15532	57584	61.7	1840	d__Bacteria;p__Verrucomicrobiota;c__Lentisphaeria;o__UBA1407;f__UBA1407;g__UBA1724;s__
MAG262	83.63	4.94	6.67	2712558	375	10658	36244	47	2742	d__Bacteria;p__Firmicutes_A;c__Clostridia;o__Lachnospirales;f__Lachnospiraceae;g__Acetatifactor;s__
MAG263	83.56	0.67	0	2031746	91	39144	111450	54.8	1825	d__Bacteria;p__Firmicutes_A;c__Clostridia;o__Oscillospirales;f__QAMX01;g__;s__
MAG264	83.48	2.25	0	1301664	102	22267	106690	26.6	1345	d__Bacteria;p__Firmicutes;c__Bacilli;o__RF39;f__CAG-302;g__CAG-914;s__CAG-914 sp000437895
MAG265	83.47	0.67	0	1144215	177	8501	24605	45.1	1184	d__Bacteria;p__Firmicutes_A;c__Clostridia;o__Oscillospirales;f__Acutalibacteraceae;g__UBA737;s__
MAG266	83.47	0	0	1525935	112	19068	48475	51.8	1426	d__Bacteria;p__Firmicutes_A;c__Clostridia_A;o__Christensenellales;f__CAG-138;g__Phil1;s__Phil1 sp004558525
MAG267	83.46	1.35	100	3267215	369	12581	50594	68.2	2491	d__Bacteria;p__Verrucomicrobiota;c__Kiritimatiellae;o__RFP12;f__UBA1067;g__RUG572;s__
MAG268	83.33	1.33	0	917858	75	18923	64435	27.5	963	d__Bacteria;p__Firmicutes;c__Bacilli;o__RF39;f__CAG-302;g__CAG-762;s__
MAG269	83.31	0.83	40	2417142	133	26982	115256	53	1908	d__Bacteria;p__Bacteroidota;c__Bacteroidia;o__Bacteroidales;f__Bacteroidaceae;g__Prevotella;s__
MAG270	83.27	6.14	0	2585592	253	17451	224937	35.1	2921	d__Bacteria;p__Firmicutes;c__Bacilli;o__Lactobacillales;f__Lactobacillaceae;g__Lactobacillus;s__
MAG271	83.26	2.84	0	2023030	264	10290	68524	51.2	2085	d__Bacteria;p__Firmicutes_A;c__Clostridia;o__Peptostreptococcales;f__Anaerovoracaceae;g__;s__
MAG272	83.09	0	0	1296965	131	16825	47404	58.6	1289	d__Bacteria;p__Firmicutes_A;c__Clostridia;o__Oscillospirales;f__Oscillospiraceae;g__ER4;s__
MAG273	83.05	0.67	0	1749339	171	13579	106488	27.8	2021	d__Bacteria;p__Firmicutes;c__Bacilli;o__RF39;f__CAG-611;g__UBA3789;s__
MAG274	82.91	2.08	28.57	2166467	128	25570	73141	47.3	2084	d__Bacteria;p__Firmicutes_A;c__Clostridia;o__Lachnospirales;f__Lachnospiraceae;g__CAG-45;s__CAG-45 sp000438375
MAG275	82.86	1.23	66.67	1813421	249	9665	57364	46.3	1775	d__Bacteria;p__Firmicutes_A;c__Clostridia;o__Oscillospirales;f__Acutalibacteraceae;g__UBA6857;s__
MAG276	82.77	0	0	1809547	204	15897	73843	63.9	1516	d__Bacteria;p__Verrucomicrobiota;c__Verrucomicrobiae;o__Opitutales;f__UBA953;g__W0P29-029;s__W0P29-029 sp004558035
MAG277	82.74	0.31	0	2001511	328	6994	45339	48.6	1752	d__Bacteria;p__Bacteroidota;c__Bacteroidia;o__Bacteroidales;f__Muribaculaceae;g__C941;s__C941 sp004557565
MAG278	82.72	2.07	75	1555548	205	10120	37963	63.2	1590	d__Bacteria;p__Firmicutes_A;c__Clostridia;o__Oscillospirales;f__Oscillospiraceae;g__CAG-103;s__CAG-103 sp900317855
MAG279	82.62	0.48	0	1426876	174	11497	30990	47.2	1273	d__Bacteria;p__Bacteroidota;c__Bacteroidia;o__Bacteroidales;f__UBA932;g__UBA1232;s__UBA1232 sp004561775
MAG280	82.44	1.71	0	1748993	33	87223	288249	32.2	1666	d__Bacteria;p__Cyanobacteria;c__Vampirovibrionia;o__Gastranaerophilales;f__Gastranaerophilaceae;g__Zag111;s__Zag111 sp002103105
MAG281	82.26	0.68	0	2082633	267	10682	29352	64.5	1745	d__Bacteria;p__Verrucomicrobiota;c__Lentisphaeria;o__UBA1407;f__UBA1407;g__;s__
MAG282	82.25	1.12	0	767102	101	9773	25417	34.3	729	d__Bacteria;p__Firmicutes;c__Bacilli;o__RFN20;f__CAG-826;g__UBA2450;s__
MAG283	82.18	0.73	0	1619516	295	6254	30491	48	1662	d__Bacteria;p__Firmicutes_A;c__Clostridia;o__Oscillospirales;f__Acutalibacteraceae;g__UBA6857;s__
MAG284	82.17	0.69	50	1682736	98	32241	84495	51.3	1508	d__Bacteria;p__Firmicutes_A;c__Clostridia;o__Oscillospirales;f__CAG-272;g__UBA11512;s__UBA11512 sp003522145
MAG285	82.1	0.11	100	1819911	316	6985	28206	44.8	1759	d__Bacteria;p__Firmicutes_A;c__Clostridia;o__Oscillospirales;f__Ruminococcaceae;g__Ruminiclostridium_E;s__
MAG286	82.07	1.34	100	1143700	208	6158	25808	45.6	1252	d__Bacteria;p__Firmicutes_A;c__Clostridia;o__Oscillospirales;f__Acutalibacteraceae;g__UBA737;s__
MAG287	82.05	2.35	16.67	1482648	87	29565	139484	55.8	1450	d__Bacteria;p__Firmicutes_A;c__Clostridia;o__Oscillospirales;f__Oscillospiraceae;g__CAG-83;s__CAG-83 sp004555205
MAG288	81.99	0	0	1629900	68	33902	85229	48.2	1491	d__Bacteria;p__Bacteroidota;c__Bacteroidia;o__Bacteroidales;f__Paludibacteraceae;g__RF16;s__
MAG289	81.98	4.99	30.77	1580770	230	8991	29778	45.7	1545	d__Bacteria;p__Firmicutes_C;c__Negativicutes;o__Acidaminococcales;f__Acidaminococcaceae;g__Phascolarctobacterium_A;s__
MAG290	81.89	0	0	1546644	173	14176	44568	46.6	1585	d__Bacteria;p__Firmicutes_A;c__Clostridia;o__Peptostreptococcales;f__Anaerovoracaceae;g__;s__
MAG291	81.82	2.25	0	1288213	87	25525	81788	25	1396	d__Bacteria;p__Firmicutes;c__Bacilli;o__RF39;f__CAG-1000;g__CAG-1000;s__
MAG292	81.71	1.93	33.33	1423785	203	8532	29313	47.3	1312	d__Bacteria;p__Bacteroidota;c__Bacteroidia;o__Bacteroidales;f__UBA932;g__UBA1232;s__UBA1232 sp004561775
MAG293	81.69	0	0	1510384	117	21001	213797	61.9	1471	d__Bacteria;p__Firmicutes_A;c__Clostridia_A;o__Christensenellales;f__CAG-138;g__RUG472;s__
MAG294	81.66	1.4	66.67	1607775	172	14237	67126	61.2	1565	d__Bacteria;p__Firmicutes_A;c__Clostridia;o__Oscillospirales;f__Oscillospiraceae;g__UBA738;s__UBA738 sp004557735
MAG295	81.64	0.37	0	2115118	216	12287	31002	50.8	1718	d__Bacteria;p__Bacteroidota;c__Bacteroidia;o__Bacteroidales;f__Bacteroidaceae;g__UBA4372;s__
MAG296	81.61	0.19	0	2156389	221	12651	49732	50.8	1673	d__Bacteria;p__Bacteroidota;c__Bacteroidia;o__Bacteroidales;f__Bacteroidaceae;g__UBA4334;s__
MAG297	81.58	0	0	1913111	132	20179	65280	56.7	1682	d__Bacteria;p__Firmicutes_A;c__Clostridia;o__Oscillospirales;f__Oscillospiraceae;g__CAG-110;s__
MAG298	81.52	0.84	50	1440317	131	16855	78668	47	1440	d__Bacteria;p__Firmicutes_A;c__Clostridia;o__Oscillospirales;f__Ruminococcaceae;g__UMGS1668;s__UMGS1668 sp004556975
MAG299	81.51	1.4	50	1246301	112	17159	47457	48	1151	d__Bacteria;p__Firmicutes_A;c__Clostridia_A;o__Christensenellales;f__CAG-917;g__CAG-349;s__CAG-349 sp003539515
MAG300	81.51	0.54	100	1774083	71	40005	95828	47.9	1604	d__Bacteria;p__Bacteroidota;c__Bacteroidia;o__Bacteroidales;f__Paludibacteraceae;g__RF16;s__
MAG301	81.49	0.37	0	2043549	209	13399	33835	50.8	1646	d__Bacteria;p__Bacteroidota;c__Bacteroidia;o__Bacteroidales;f__Bacteroidaceae;g__UBA4372;s__
MAG302	81.48	1.38	0	2279348	188	15685	67516	62.7	1807	d__Bacteria;p__Verrucomicrobiota;c__Lentisphaeria;o__UBA1407;f__UBA1407;g__UBA1724;s__
MAG303	81.43	0.11	0	1389118	161	11989	50409	48.4	1330	d__Bacteria;p__Firmicutes_A;c__Clostridia;o__Oscillospirales;f__CAG-272;g__CAG-724;s__CAG-724 sp900551005
MAG304	81.41	1.79	0	1856556	188	14370	50104	55.5	1740	d__Bacteria;p__Firmicutes_A;c__Clostridia;o__Oscillospirales;f__QAMX01;g__;s__
MAG305	81.32	0.75	0	1884890	257	10281	33001	55.6	1612	d__Bacteria;p__Bacteroidota;c__Bacteroidia;o__Bacteroidales;f__Muribaculaceae;g__CAG-873;s__
MAG306	81.13	0	0	1622875	193	11729	48207	32.7	1730	d__Bacteria;p__Firmicutes;c__Bacilli;o__Erysipelotrichales;f__Erysipelotrichaceae;g__UBA1783;s__
MAG307	81.07	1.23	33.33	2256899	343	8168	36129	47.1	2185	d__Bacteria;p__Firmicutes_A;c__Clostridia;o__Oscillospirales;f__Ruminococcaceae;g__UMGS1889;s__
MAG308	81.04	1.27	50	2142554	224	14123	51047	49.8	2133	d__Bacteria;p__Firmicutes_A;c__Clostridia;o__Lachnospirales;f__Lachnospiraceae;g__Clostridium_Q;s__
MAG309	81.02	0	0	1795755	145	16451	68902	47	1693	d__Bacteria;p__Spirochaetota;c__Spirochaetia;o__Sphaerochaetales;f__Sphaerochaetaceae;g__UBA5920;s__
MAG310	81	2.22	0	1710650	359	5535	27248	51.9	1720	d__Bacteria;p__Firmicutes_C;c__Negativicutes;o__Selenomonadales;f__Selenomonadaceae;g__Anaerovibrio;s__
MAG311	81	0.67	0	1928425	163	17338	62917	60.1	1856	d__Bacteria;p__Firmicutes_A;c__Clostridia;o__Oscillospirales;f__Oscillospiraceae;g__UBA738;s__UBA738 sp004557735
MAG312	80.95	0.37	0	2241702	259	11039	50030	50.5	1884	d__Bacteria;p__Firmicutes_A;c__Clostridia_A;o__Christensenellales;f__CAG-138;g__UBA1685;s__UBA1685 sp004560435
MAG313	80.95	1.98	100	1563625	201	11096	37924	58.5	1609	d__Bacteria;p__Bacteroidota;c__Bacteroidia;o__Bacteroidales;f__Bacteroidaceae;g__UBA4372;s__
MAG314	80.9	1.12	0	1167929	95	27473	87363	26.6	1082	d__Bacteria;p__Firmicutes;c__Bacilli;o__RFN20;f__CAG-826;g__UBA4855;s__
MAG315	80.85	3.69	10	1647368	269	7805	27363	55.9	1644	d__Bacteria;p__Firmicutes_A;c__Clostridia;o__Oscillospirales;f__Oscillospiraceae;g__CAG-110;s__
MAG316	80.84	3.02	100	1595496	176	12122	43593	56.6	1522	d__Bacteria;p__Firmicutes_A;c__Clostridia;o__Oscillospirales;f__Oscillospiraceae;g__CAG-110;s__
MAG317	80.61	0.36	50	1465982	185	9522	50395	49.1	1368	d__Bacteria;p__Firmicutes_A;c__Clostridia;o__Oscillospirales;f__CAG-272;g__CAG-724;s__CAG-724 sp003524145
MAG318	80.5	2.49	16.67	1469887	148	15021	59207	32.9	1534	d__Bacteria;p__Firmicutes;c__Bacilli;o__Erysipelotrichales;f__Erysipelotrichaceae;g__UBA1783;s__
MAG319	80.42	0.87	0	1863851	244	9531	31979	53.8	1643	d__Bacteria;p__Bacteroidota;c__Bacteroidia;o__Bacteroidales;f__UBA932;g__RC9;s__RC9 sp004552965
MAG320	80.26	0	0	1974044	213	12458	71813	46.8	1834	d__Bacteria;p__Firmicutes_A;c__Clostridia;o__Lachnospirales;f__Lachnospiraceae;g__UBA11957;s__
MAG321	80.22	1.35	0	807423	121	7632	45009	44.7	896	d__Bacteria;p__Proteobacteria;c__Alphaproteobacteria;o__Rs-D84;f__Rs-D84;g__Rs-D84;s__
MAG322	80.16	0	0	1654442	91	30104	80710	49.5	1485	d__Bacteria;p__Firmicutes_A;c__Clostridia;o__Oscillospirales;f__Acutalibacteraceae;g__CAG-177;s__
